# Supplementary material
Source: PubMed Central journal article supplement (PMC5302127)
Supplement: NIHMS832530-supplement-01.pdf [file NIHMS832530-supplement-01.pdf]

### *mRNA half-life analysis (Extended Data Fig. 10f)*

Half-lives of transcripts with FH-AGO2<sup>5XA</sup> CLIP clusters in their 3' UTRs were obtained from a previously published study<sup>38</sup>. Genes that had half-lives assigned to more than one RefSeq mRNA isoform were removed to avoid ambiguity. Genes in the top quartile of half-lives were defined as having a long half-life ( $N = 273$ ) and genes in the bottom quartile of half-lives were defined as having a short half-life ( $N = 274$ ). The total number of CLIP reads in clusters in a given 3' UTR were obtained for each replicate and edgeR (v 3.8.6)<sup>46</sup> was used to calculate the normalized fold change of CLIP coverage comparing FH-AGO2<sup>5XA</sup> to FH-AGO2<sup>WT</sup>.

### **Data Availability**

All high-throughput sequencing data generated in the course of this study (CRISPR-Cas9 screens, RNA-seq, eCLIP) have been deposited in GEO under accession code GSE89946.

### **Supplementary References**

39. Kluiver, J. *et al.* Rapid generation of microRNA sponges for microRNA inhibition. *PLoS One* **7**, e29275 (2012).
40. Largaespada, D. A. & Collier, L. S. Transposon-mediated mutagenesis in somatic cells: identification of transposon-genomic DNA junctions. *Methods Mol Biol* **435**, 95-108 (2008).
41. Wessel, D. & Flugge, U. I. A method for the quantitative recovery of protein in dilute solution in the presence of detergents and lipids. *Anal Biochem* **138**, 141-143 (1984).
42. Rudel, S., Flatley, A., Weinmann, L., Kremmer, E. & Meister, G. A multifunctional human Argonaute2-specific monoclonal antibody. *RNA* **14**, 1244-1253 (2008).
43. Patel, R. K. & Jain, M. NGS QC Toolkit: a toolkit for quality control of next generation sequencing data. *PLoS One* **7**, e30619 (2012).
44. Kim, D. *et al.* TopHat2: accurate alignment of transcriptomes in the presence of insertions, deletions and gene fusions. *Genome Biol* **14**, R36 (2013).
45. Liao, Y., Smyth, G. K. & Shi, W. featureCounts: an efficient general purpose program for assigning sequence reads to genomic features. *Bioinformatics* **30**, 923-930 (2014).

46. Robinson, M. D., McCarthy, D. J. & Smyth, G. K. edgeR: a Bioconductor package for differential expression analysis of digital gene expression data. *Bioinformatics* **26**, 139-140 (2010).
47. Marcel, M. Cutadapt removes adapter sequences from high-throughput sequencing reads. *Bioinformatics in Action* **35** (2011).
48. Quinlan, A. R. & Hall, I. M. BEDTools: a flexible suite of utilities for comparing genomic features. *Bioinformatics* **26**, 841-842 (2010).
49. Kim, Y. K., Kim, B. & Kim, V. N. Re-evaluation of the roles of DROSHA, Exportin 5, and DICER in microRNA biogenesis. *Proc Natl Acad Sci U S A* **113**, E1881-1889 (2016).
50. Jiang, H. & Wong, W. H. SeqMap: mapping massive amount of oligonucleotides to the genome. *Bioinformatics* **24**, 2395-2396 (2008).
