# Supplementary material
Source: PubMed Central journal article supplement (PMC5302127)

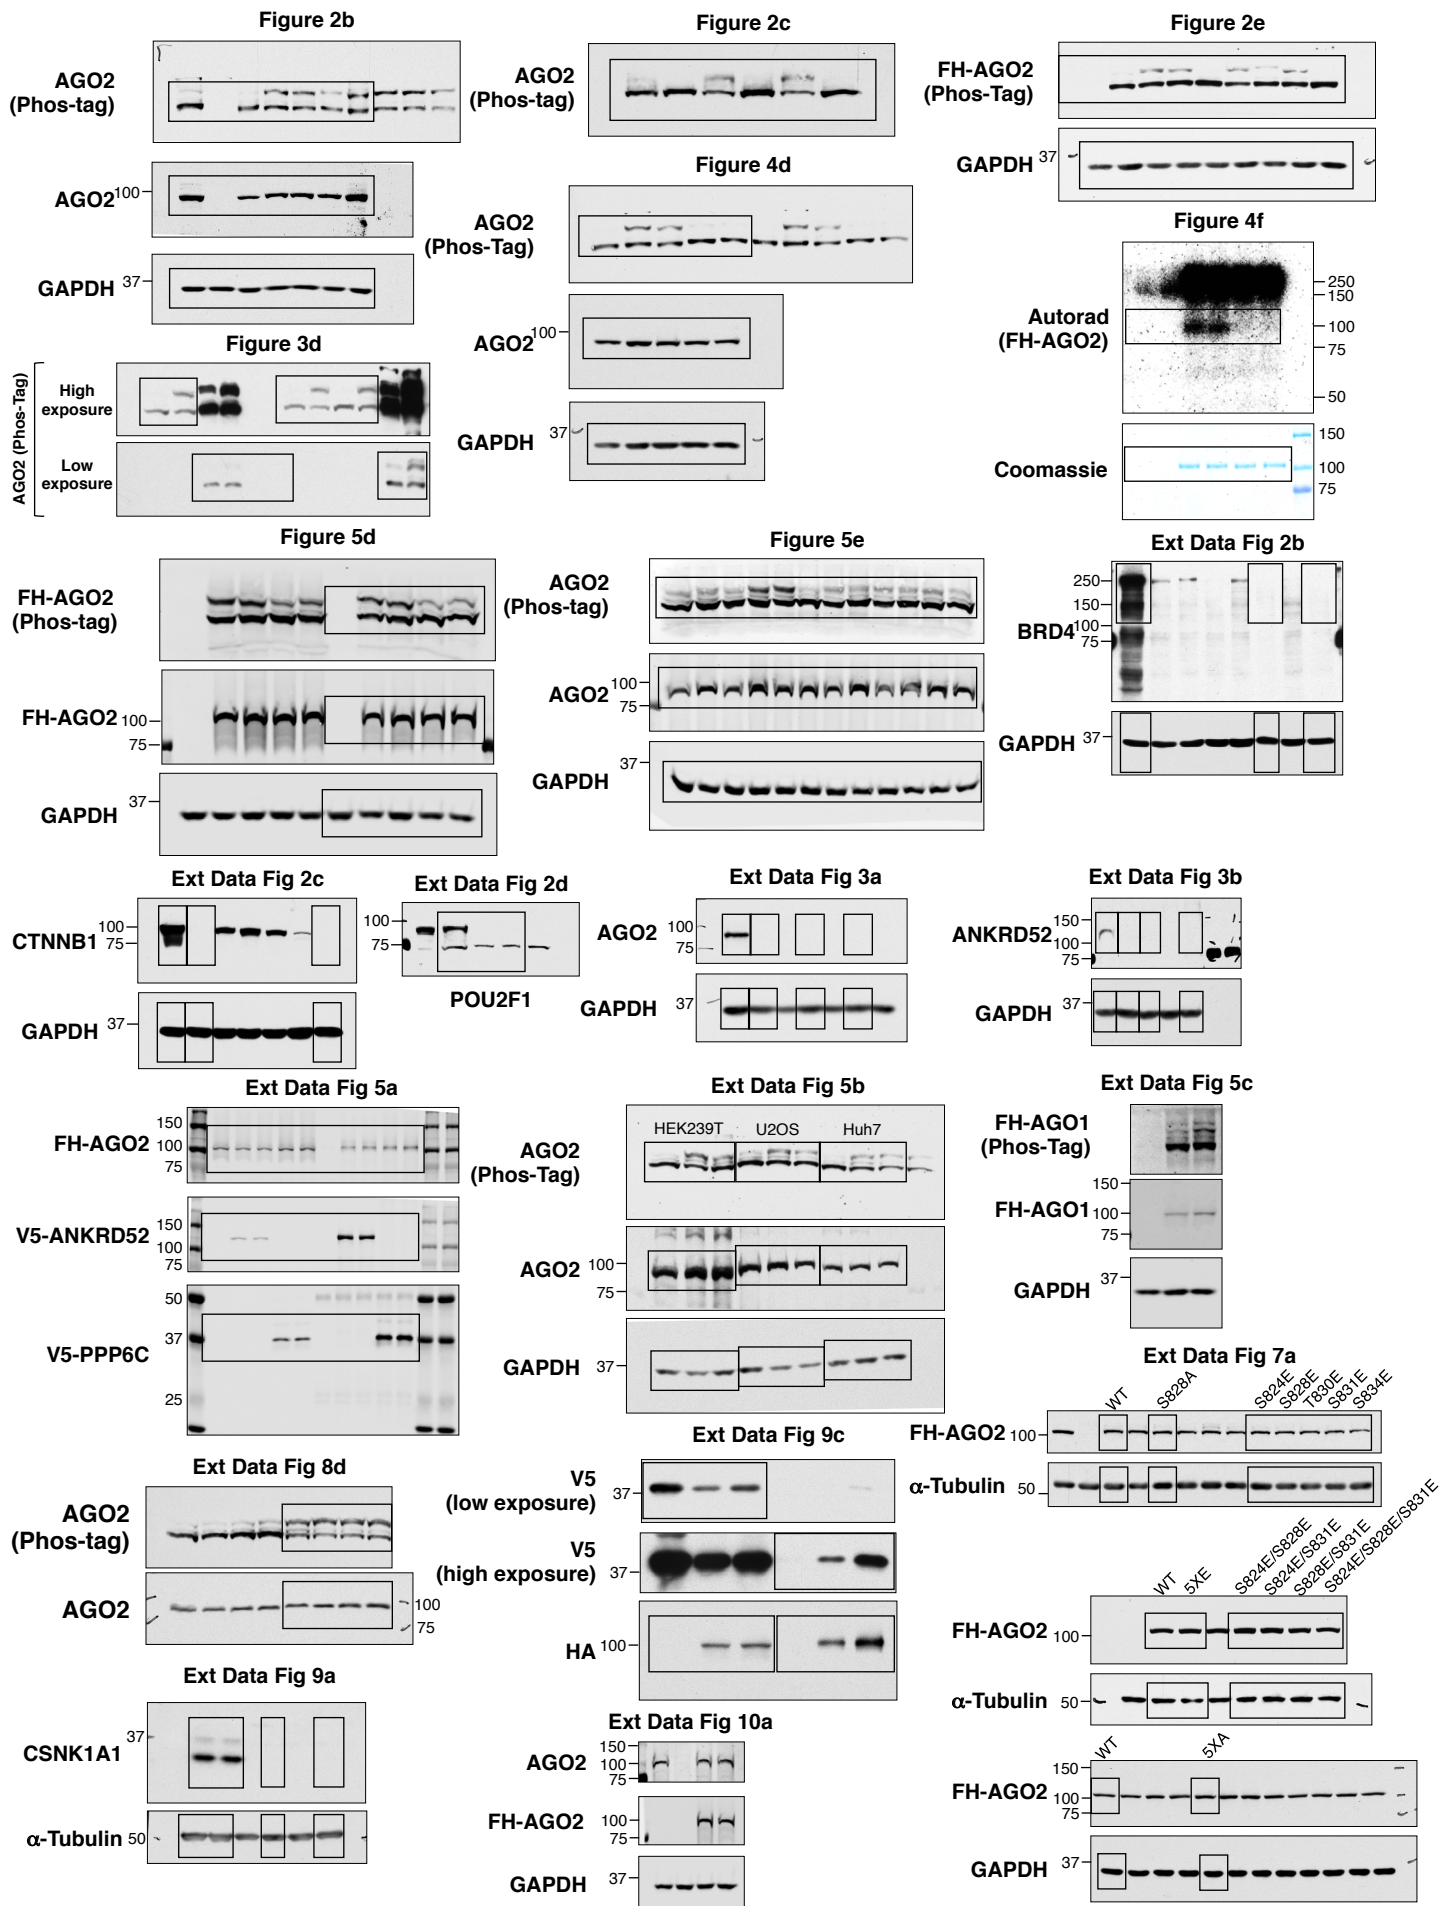

Supplement: NIHMS832530-supplement-supp_figure1.pdf [file NIHMS832530-supplement-supp_figure1.pdf]
